# Supplementary material for: Linoleic acid improves PIEZO2 dysfunction in a mouse model of Angelman Syndrome
Source: PubMed Central journal article supplement (PMC9977963; doi:10.1038/s41467-023-36818-0), 2023-03-01
Supplement: 41467_2023_36818_MOESM1_ESM.pdf [file 41467_2023_36818_MOESM1_ESM.pdf]

SUPPLEMENTARY INFORMATION

**Linoleic Acid Improves PIEZO2 Dysfunction in a mouse model of Angelman Syndrome**

Romero, Caires et al.

SUPPLEMENTARY FIGURES

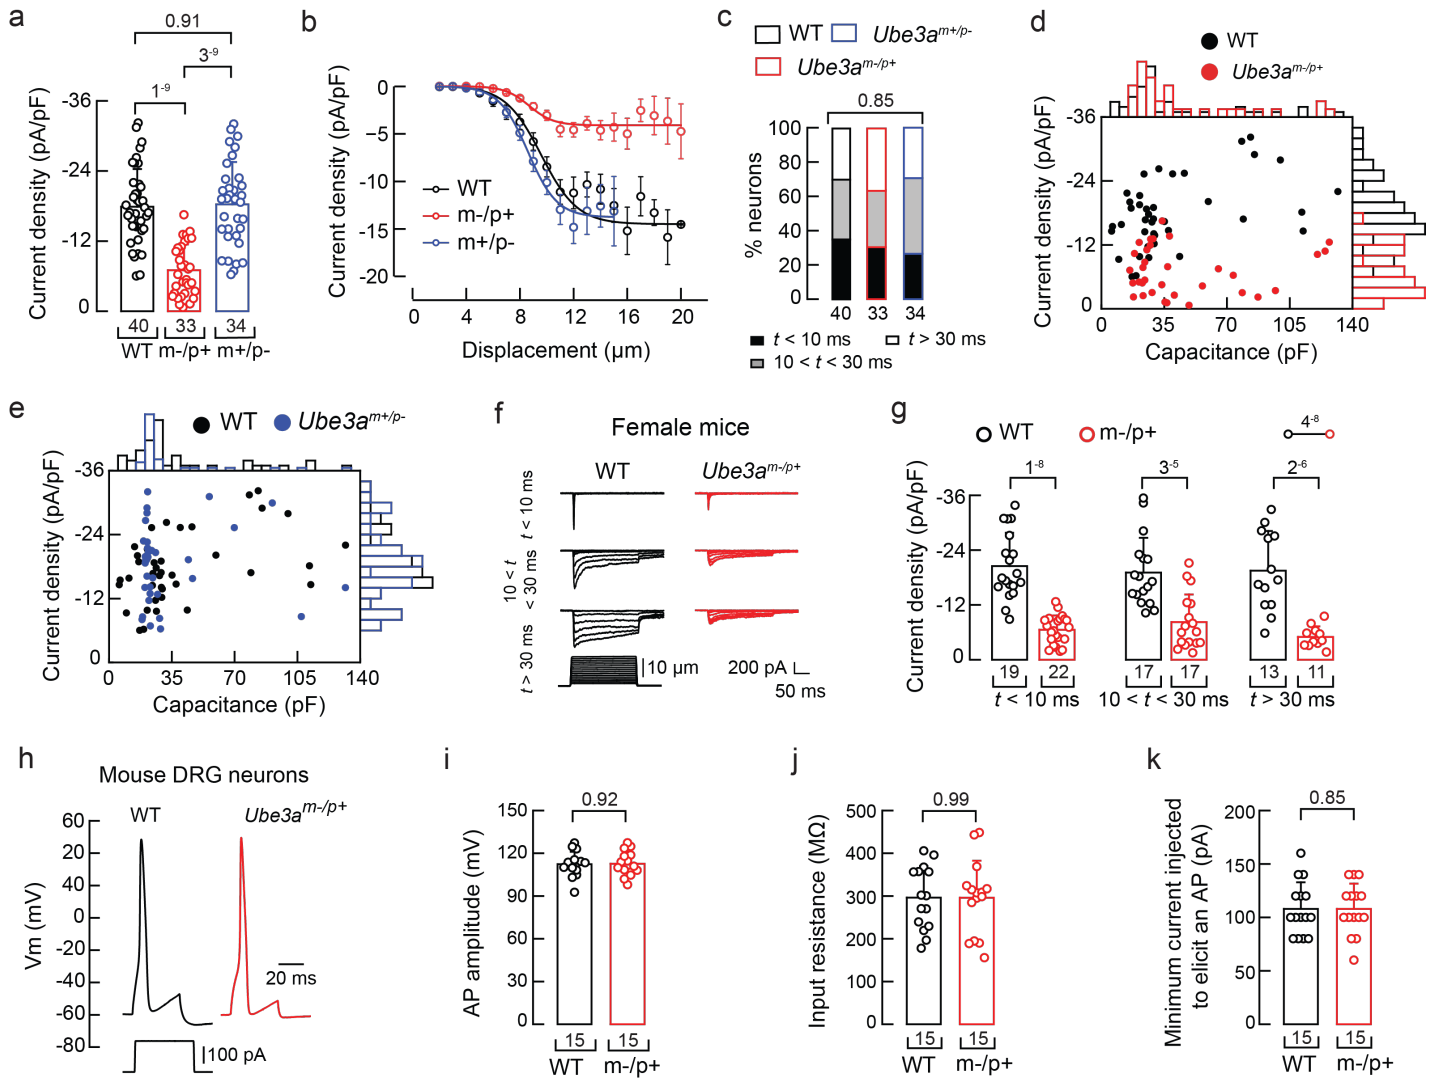

**Supplementary Fig. 1. Mechanocurrents and inactivation distribution of DRG neurons from AS mice.**  
**a** Current densities elicited by maximum displacement of WT, *Ube3a*<sup>m-/p+</sup>, and *Ube3a*<sup>m+/p-</sup> mouse DRG neurons. Bars are mean ± SD. Kruskal-Wallis ( $H = 47.17$ ;  $p = 5.73 \times 10^{-11}$ ) and Dunn's multiple comparisons test. **b** Current density responses to various displacements of WT, *Ube3a*<sup>m-/p+</sup>, and *Ube3a*<sup>m+/p-</sup> mouse DRG neurons. A Boltzmann function was fitted to the data. Each circle represents the mean ± SEM. For WT, n = 40, 40, 40, 40, 40, 40, 39, 39, 38, 35, 25, 18, 14, 10, 7, 4, 4, 3, 2, per displacement. For *Ube3a*<sup>m-/p+</sup>, n = 33, 33, 33, 33, 33, 33, 33, 33, 31, 26, 18, 14, 8, 8, 4, 3, 3, 3, per displacement. For *Ube3a*<sup>m+/p-</sup>, n = 34, 34, 34, 34, 34, 34, 34, 34, 31, 28, 21, 9, 6, 4, per displacement. **c** Proportions of neurons classified by their time constant of inactivation of mechano-activated currents elicited by maximum displacement of WT, *Ube3a*<sup>m-/p+</sup>, and *Ube3a*<sup>m+/p-</sup> mouse DRG neurons. Chi-square test ( $\chi^2 = 1.37$ ;  $p = 0.85$ ). **d** Scatter plot of current density vs. capacitance of WT and *Ube3a*<sup>m-/p+</sup> mouse DRG neurons. Top and right display the corresponding marginal histograms. **e** Scatter plot of current density vs. capacitance of WT and *Ube3a*<sup>m+/p-</sup> mouse DRG neurons. Top and right display the corresponding marginal histograms. **f** Representative whole-cell patch-clamp recordings elicited by mechanical stimulation (at -60 mV) of rapidly, intermediate, and slowly inactivating currents of WT and *Ube3a*<sup>m-/p+</sup> DRG neurons from female mice. **g** Current densities elicited by maximum displacement of DRG neurons from female mice, classified by their time constant of inactivation. Bars are mean ± SD. Two-way ANOVA ( $F = 103.04$ ;  $p = 1.11 \times 10^{-16}$ ) and Tukey multiple-comparisons test. **h** Representative current-clamp recording of membrane potential changes elicited by current injection in WT and *Ube3a*<sup>m-/p+</sup> mouse DRG neurons. **i** Action potential amplitudes evoked by current injection in WT and *Ube3a*<sup>m-/p+</sup> mouse DRG neurons. Bars are mean ± SD. Two-

tailed unpaired t-test ( $t = 0.10$ ). **j** Input resistance of WT and *Ube3a*<sup>m-/p+</sup> mouse DRG neurons. Bars are mean  $\pm$  SD. Two-tailed unpaired t-test ( $t = 0.013$ ). **k** Minimum current injected that elicited action potentials in WT and *Ube3a*<sup>m-/p+</sup> mouse DRG neurons. Bars are mean  $\pm$  SD. Two-tailed Mann-Whitney test ( $U = 107.5$ ). **n** is denoted in each panel. Post hoc *p*-values are denoted above the bars. Source data are provided as a Source Data file.

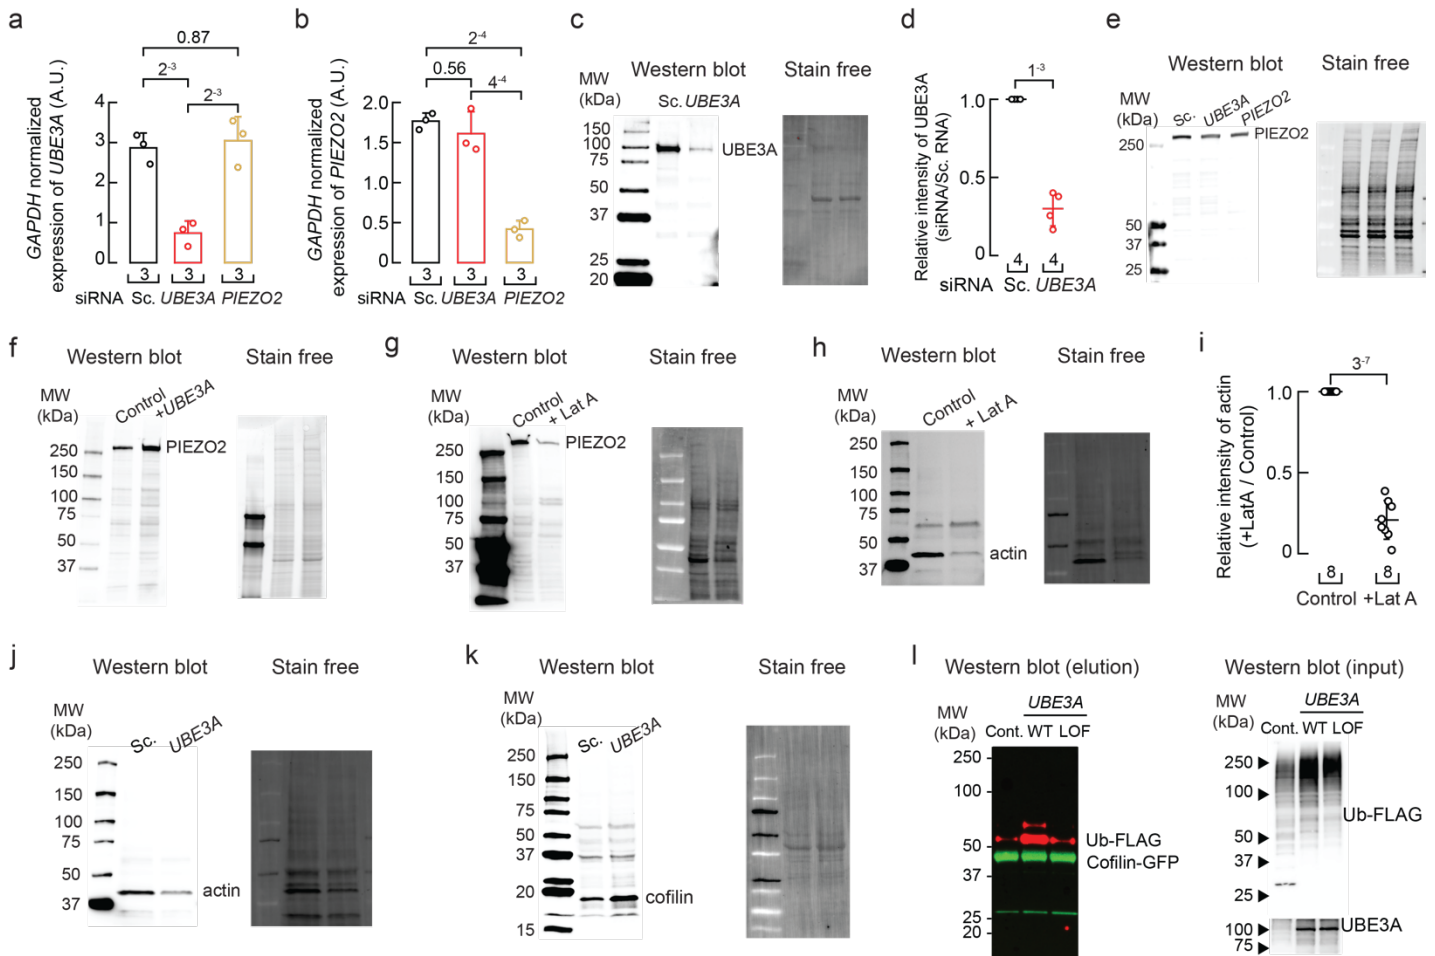

### Supplementary Fig. 2. RT-qPCR and western blots after *UBE3A* knockdown or overexpression, latrunculin A treatment, and cofilin ubiquitination.

**a** Relative normalized expression of *UBE3A* for MCC13 cells transfected with scrambled (Sc.), *UBE3A*, or *PIEZO2* siRNAs. Bars are mean  $\pm$  SD. One-way ANOVA ( $F = 25.37$ ;  $p = 0.0012$ ) and Tukey multiple-comparisons tests. **b** Relative normalized expression of *PIEZO2* for MCC13 cells transfected with scrambled (Sc.), *UBE3A*, or *PIEZO2* siRNAs. Bars are mean  $\pm$  SD. One-way ANOVA ( $F = 50.94$ ;  $p = 1.72 \times 10^{-4}$ ) and Tukey multiple-comparisons tests. **c** Representative western (anti-UBE3A) and stain-free blots of the cytosolic fractions of MCC13 cells transfected with scrambled or *UBE3A* siRNAs (48 h). **d** Mean/scatter-dot plot showing relative intensities of UBE3A protein normalized to the level of UBE3A in the Sc. group. Lines are mean  $\pm$  SD. Two-tailed one sample *t*-test ( $t = -12.7$ ). **e** Representative western (anti-PIEZO2) and stain-free blots of the membrane fractions of MCC13 cells transfected with scrambled, *UBE3A*, or *PIEZO2* siRNAs (48 h), from six independent cultures. **f** Representative western (anti-PIEZO2) and stain-free blots of the membrane fractions of MCC13 cells transfected with control or *UBE3A* plasmids, from seven independent cultures. **g** Representative western (anti-PIEZO2) and stain-free blots of the membrane fractions of MCC13 cells treated with latrunculin A (1  $\mu$ M; 24 h), from eight independent cultures. **h** Representative western (anti-actin) and stain-free blots of the cytoskeletal fractions of MCC13 cells treated with latrunculin A (1  $\mu$ M; 24 h). **i** Mean/scatter-dot plot

showing relative intensities of actin protein normalized to the level of actin in the control group. Lines are mean  $\pm$  SD. n is denoted below the circles. One sample *t*-test ( $t = -18.73$ ). **j** Representative western (anti-actin) and stain-free blots of the cytoskeletal fractions of MCC13 cells transfected with scrambled or *UBE3A* siRNAs (48 h), from eight independent cultures. **k** Representative western (anti-cofilin) and stain-free blots of the cytosolic fractions of MCC13 cells transfected with scrambled or *UBE3A* siRNAs (48 h), from five independent cultures. **l** Left, representative western blot of pull-down GFP-tagged Cofilin from HEK293T cells transfected with a control vector (Ctrl), wild-type *UBE3A* (WT), or a catalytically inactive *UBE3A* (LOF), from four independent preparations. The ubiquitinated (Ub) fraction (red) was monitored with an anti-FLAG antibody. Right, representative western blots (anti-FLAG and anti-UBE3A, respectively) of the input fractions (lysate), from four independent preparations. n is denoted in each panel. Post-hoc *p*-values are denoted in the corresponding panels. Source data are provided as a Source Data file.

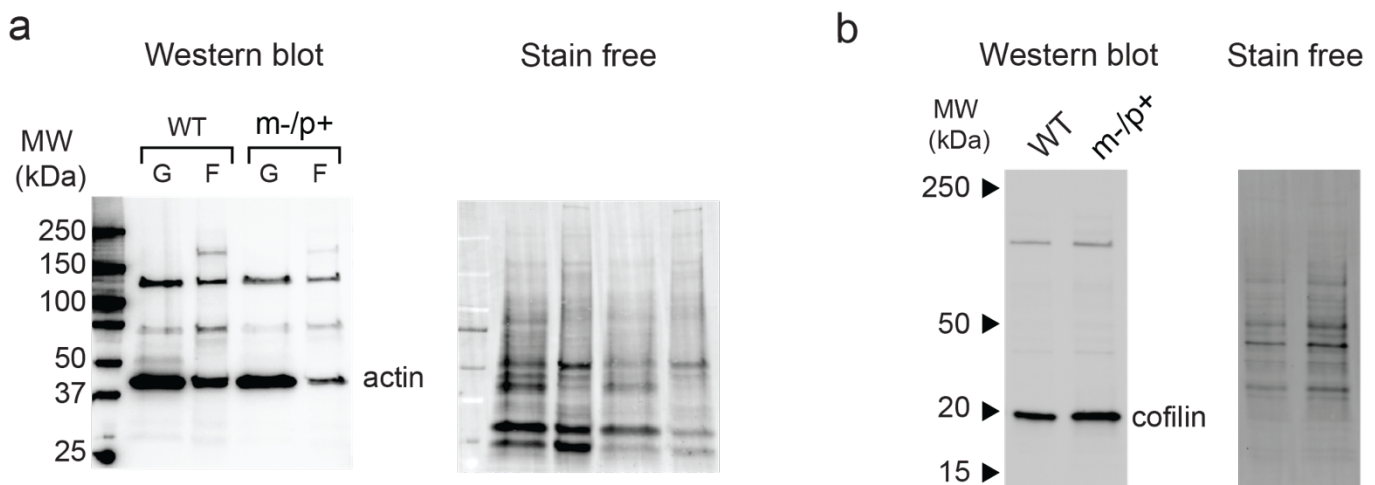

**Supplementary Fig. 3. G-actin, F-actin, and cofilin content of *Ube3a*<sup>m-/p+</sup> DRGs.**

**a** Representative western (anti-actin) and stain-free blots of soluble and insoluble actin (G and F, respectively) of WT and *Ube3a*<sup>m-/p+</sup> DRGs, from 12 mice. **b** Representative western blot (anti-cofilin) and stain-free blots of the cytosolic fractions of WT and *Ube3a*<sup>m-/p+</sup> DRGs, from 8 mice.

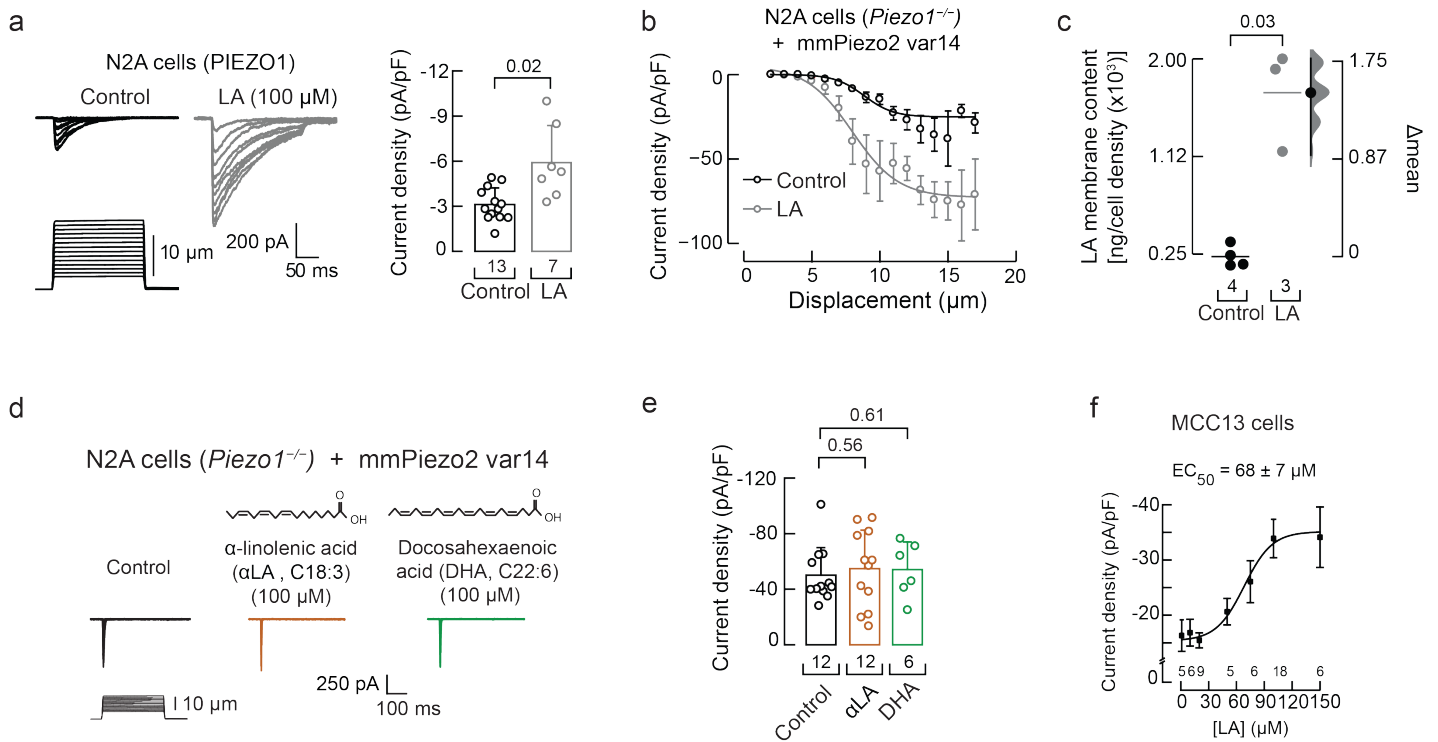

#### Supplementary Fig. 4. Effect of PUFAs on PIEZOs channel function in N2A cells.

**a** Left, representative whole-cell patch-clamp recordings of currents elicited by mechanical stimulation (at -60 mV) in control or LA (100  $\mu$ M; 24 h)-treated N2A cells (endogenously expressing *Piezo1*). Right, current densities elicited by maximum displacement of control or LA-treated N2A cells (endogenously expressing *Piezo1*). Bars are mean  $\pm$  SD. Two-tailed unpaired *t*-test with Welch's correction ( $t = 2.84$ ). **b** Current density responses to various displacements of control vs. LA-treated *Piezo1*<sup>-/-</sup> N2A cells transfected with *Piezo2* variant 14 (var14). A Boltzmann function was fitted to the data. Each circle represents the mean  $\pm$  SEM. For control,  $n = 12, 12, 12, 12, 12, 12, 12, 12, 11, 11, 9, 8, 7, 5, 3, 3$ , per displacement. For LA-treated cells,  $n = 17, 17, 17, 17, 17, 17, 17, 16, 14, 13, 12, 11, 10, 6, 5$ , per displacement. **c** Gardner–Altman estimation plot showing the mean difference in LA membrane content in control and LA (100  $\mu$ M)-treated N2A cells, as determined by LC-MS. Raw data are plotted on the left axis. The mean difference, on the right, is depicted as a dot; the 95% confidence interval is indicated by the ends of the vertical error bars. Two-tailed unpaired *t*-test with Welch's correction ( $t = 5.47$ ). **d** Representative whole-cell patch-clamp recordings of control,  $\alpha$ LA, and DHA (100  $\mu$ M; 24 h)-treated *Piezo1*<sup>-/-</sup> N2A cells transfected with *Piezo2* var14. **e** Current densities elicited by maximum displacement of control,  $\alpha$ LA, and DHA (100  $\mu$ M; 24 h)-treated *Piezo1*<sup>-/-</sup> N2A cells transfected with *Piezo2* var14. Bars are mean  $\pm$  SD. Kruskal-Wallis ( $H = 0.43$ ;  $p = 0.81$ ) and Dunn's multiple comparisons test. **f** Current densities elicited by maximum displacement of MCC13 cells treated with various LA concentrations. A Boltzmann function was fitted to the data. Squares are mean  $\pm$  SEM.  $n$  is denoted in each panel. Post-hoc *p*-values are denoted in the corresponding panels. Source data are provided as a Source Data file.

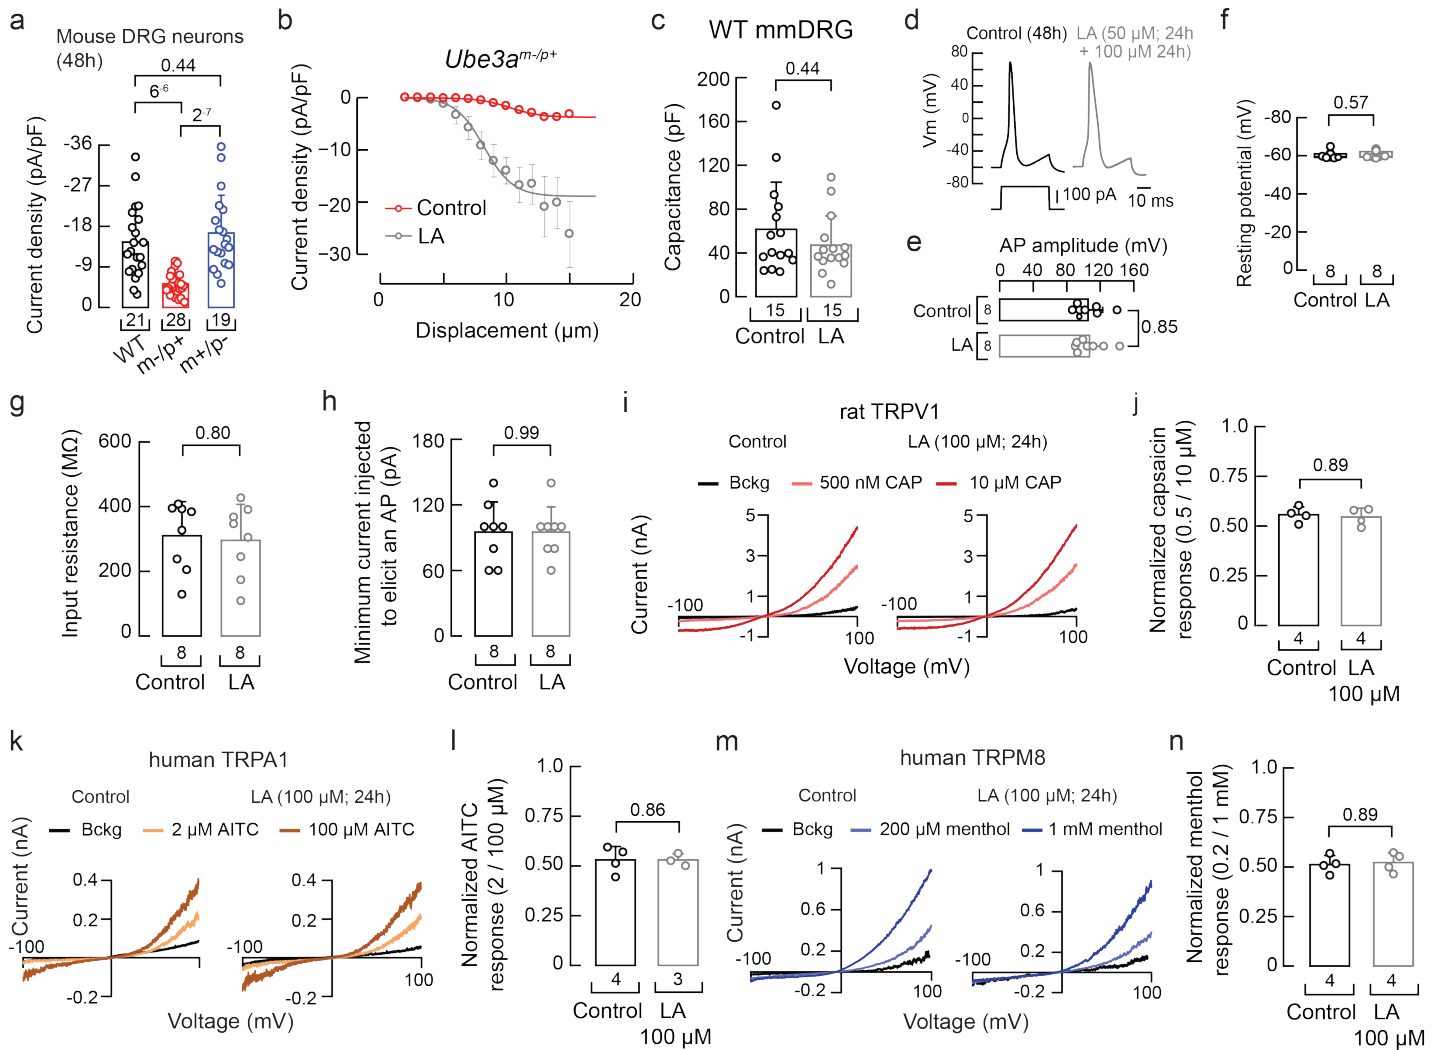

### Supplementary Fig. 5. Electrophysiological characterization of neuronal electrical excitability and sensory ion channels in LA-treated cells.

**a** Current densities elicited by maximum displacement of WT, *Ube3a*<sup>m-/p+</sup>, and *Ube3a*<sup>m+/p-</sup> DRG neurons recorded after culturing for 48 h. Bars are mean ± SD. Kruskal-Wallis (H = 34.18; p = 3.78<sup>-8</sup>) and Dunn's multiple comparisons test. **b** Current density responses to various displacements of *Ube3a*<sup>m-/p+</sup> mouse DRG neurons supplemented with or without LA. A Boltzmann function was fitted to the data. Each circle represents the mean ± SEM. For control, n = 28, 28, 28, 28, 28, 28, 28, 28, 28, 27, 25, 23, 16, 9, 7, 6, per displacement. For LA-treated cells, n = 28, 28, 28, 28, 28, 28, 28, 27, 26, 23, 17, 13, 10, 8, 5, 5, per displacement. **c** Membrane capacitance of control and LA-treated WT mouse DRG neurons. Bars are mean ± SD. Two-tailed Mann-Whitney test (U = 93). **d** Representative current-clamp recording of membrane potential changes elicited by current injection in control and LA (50 μM for 24 h and 100 μM for another 24 h)-treated WT mouse DRG neurons. **e** Action potential amplitudes evoked by current injection in control and LA-treated WT mouse DRG neurons. Bars are mean ± SD. Two-tailed unpaired t-test (t = 0.19). **f** Boxplot of the resting potential values recorded immediately after establishing the whole-cell configuration in control and LA-treated WT mouse DRG neurons. Boxplots show mean (square), median (bisecting line), bounds of box (75<sup>th</sup> to 25<sup>th</sup> percentiles), outlier range with 1.5 coefficient (whiskers), and minimum and maximum data points. Two-tailed Mann-Whitney test (U = 26). **g** Input resistance of control and LA-treated WT mouse DRG neurons. Bars are mean ± SD. Two-tailed unpaired t-test (t = 0.26). **h** Minimum current injected that elicited action potentials in control and LA-treated WT mouse DRG neurons. Bars are mean ± SD. Two-tailed Mann-Whitney test (U = 31.5). **i**

Representative current-voltage relationships of control and LA (100  $\mu\text{M}$ )-treated *Piezo1*<sup>-/-</sup> N2A cells transfected with rTRPV1 challenged with capsaicin (CAP; 500 nM and 10  $\mu\text{M}$ ). Bckg indicates background currents. **j** Normalized capsaicin response (500 nM and 10  $\mu\text{M}$ ) of control and LA (100  $\mu\text{M}$ )-treated *Piezo1*<sup>-/-</sup> N2A cells transfected with rTRPV1. Bars are mean  $\pm$  SD. Two-tailed Mann-Whitney test ( $U = 7$ ). **k** Representative current-voltage relationships of control and LA (100  $\mu\text{M}$ )-treated *Piezo1*<sup>-/-</sup> N2A cells transfected with hTRPA1 challenged with allyl isothiocyanate (AITC; 2  $\mu\text{M}$  and 100  $\mu\text{M}$ ). Bckg indicates background currents. **l** Normalized AITC response (2  $\mu\text{M}$  and 100  $\mu\text{M}$ ) of control and LA (100  $\mu\text{M}$ )-treated *Piezo1*<sup>-/-</sup> N2A cells transfected with hTRPA1. Bars are mean  $\pm$  SD. Two-tailed Mann-Whitney test ( $U = 5$ ). **m** Representative current-voltage relationships of control and LA (100  $\mu\text{M}$ )-treated *Piezo1*<sup>-/-</sup> N2A cells transfected with hTRPM8 challenged with menthol (200  $\mu\text{M}$  and 1 mM). Bckg indicates background currents. **n** Normalized menthol response (200  $\mu\text{M}$  and 1 mM) of control and LA (100  $\mu\text{M}$ )-treated *Piezo1*<sup>-/-</sup> N2A cells transfected with hTRPM8. Bars are mean  $\pm$  SD. Two-tailed Mann-Whitney test ( $U = 7$ ). n is denoted in each panel. Post hoc *p*-values are denoted above the boxes and bars. Source data are provided as a Source Data file.

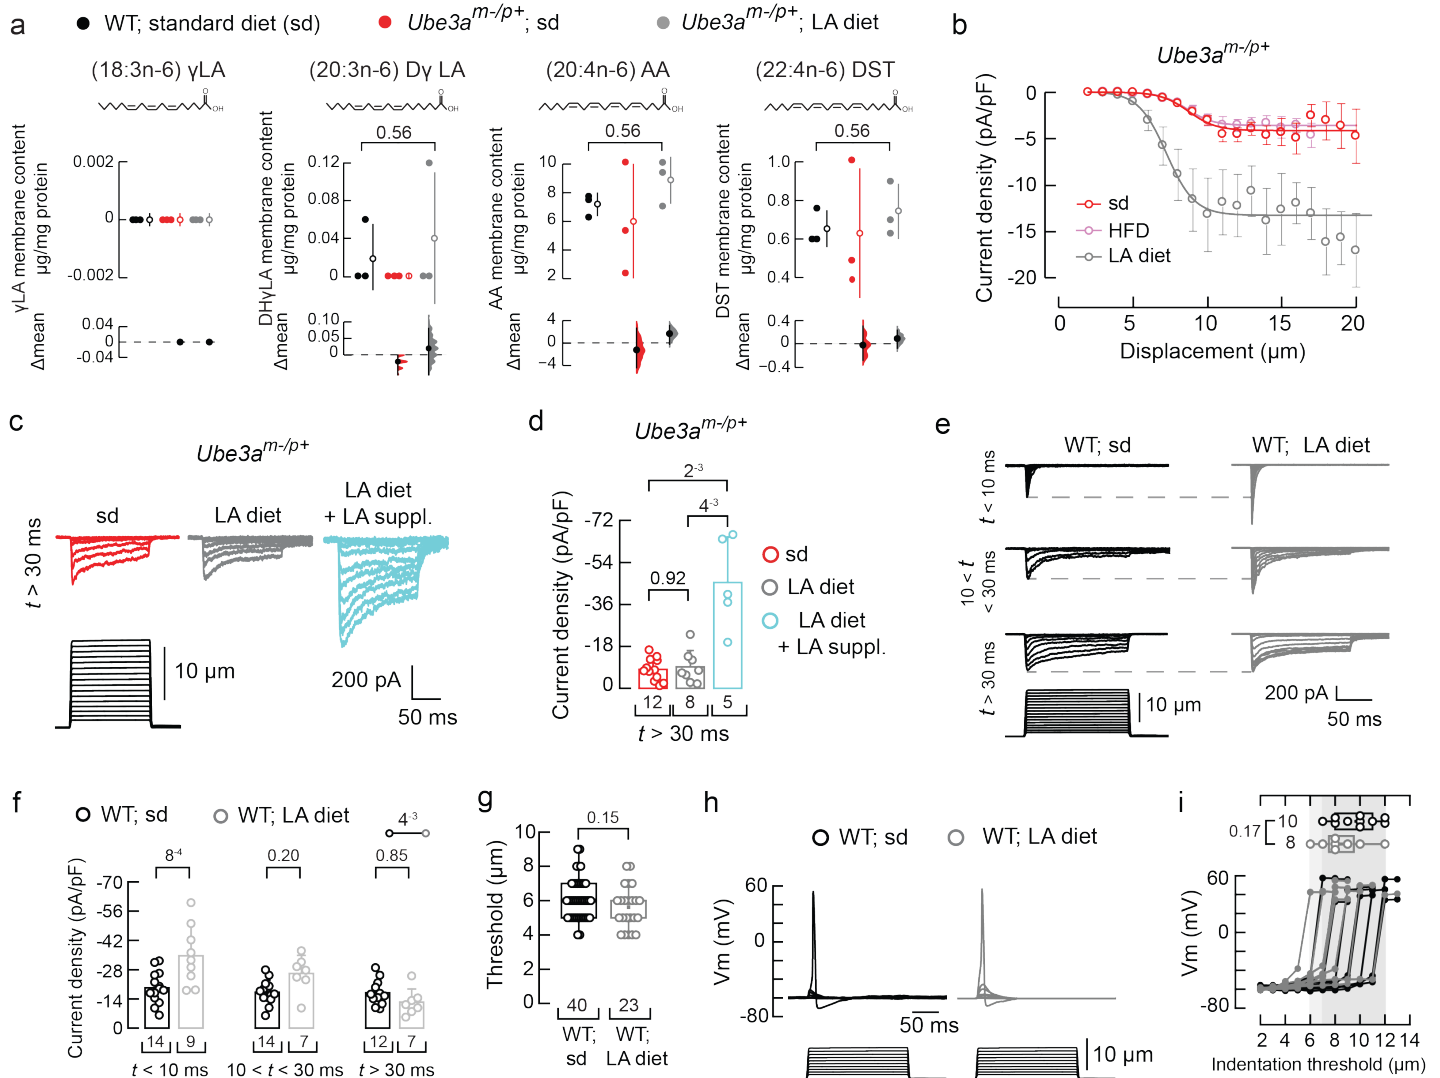

**Supplementary Fig. 6. Content of PUFAs downstream of LA in mice fed with a standard or LA-enriched diet.**

**a** Cumming estimation plots showing the mean differences in  $\gamma$ -linolenic acid ( $\gamma$ LA), dihomo-  $\gamma$ -linolenic acid (D $\gamma$ LA), arachidonic acid (AA), and docosatetraenoic acid (DST) membrane content in the DRGs of WT and *Ube3a<sup>m-/p+</sup>* mice fed with a standard diet, as well as *Ube3a<sup>m-/p+</sup>* mice fed with a LA-enriched diet. Raw data are plotted on the upper axes ( $n = 3$ ); each mean difference is plotted on the lower axes as a bootstrap sampling distribution. The mean differences are depicted as dots; 95% confidence intervals are indicated by the ends of the vertical error bars. Kruskal-Wallis (for D $\gamma$ LA:  $H = 1.17$  and  $p = 0.56$ ; for AA:  $H = 1.16$  and  $p = 0.56$ ; for DST:  $H = 1.17$  and  $p = 0.56$ ) and Dunn's multiple comparisons tests.  $n = 3$ . **b** Current density responses to various displacements of DRG neurons from of *Ube3a<sup>m-/p+</sup>* mice fed with standard (sd), high-fat (HFD) or LA-enriched (LA diet) diets. A Boltzmann function was fitted to the data. Each circle represents the mean  $\pm$  SEM. For sd,  $n = 33, 33, 33, 33, 33, 33, 33, 33, 33, 31, 26, 18, 14, 8, 8, 4, 3, 3, 3$ , per displacement. For HFD,  $n = 30, 30, 30, 30, 30, 30, 30, 30, 30, 27, 24, 16, 12, 8, 6, 4$ , per displacement. For LA diet,  $n = 38, 38, 38, 38, 38, 38, 38, 36, 33, 26, 24, 20, 19, 16, 13, 11, 10, 9, 7$ , per displacement. **c** Representative whole-cell patch-clamp recordings elicited by mechanical stimulation (at  $-60$  mV) of slowly inactivating currents in DRG neurons from *Ube3a<sup>m-/p+</sup>* mice fed with a standard diet, LA-enriched diet, or LA-enriched diet plus LA supplementation using the two-day LA supplementation protocol ( $50 \mu\text{M}$  for 24 h and  $100 \mu\text{M}$  for another 24 h). **d** Slowly inactivating current densities elicited by maximum displacement of DRG neurons of slowly inactivating currents in DRG neurons from *Ube3a<sup>m-/p+</sup>* mice fed with a standard diet, LA-enriched diet, or LA-enriched diet plus LA supplementation using the two-day LA supplementation protocol ( $50 \mu\text{M}$  for 24 h and  $100 \mu\text{M}$  for another 24 h). Bars are mean  $\pm$  SD. Kruskal-Wallis ( $H = 11.09$ ;  $p = 3.9^{-4}$ ) and Dunn's multiple comparisons tests. **e** Representative whole-cell patch-clamp recordings elicited by mechanical stimulation (at  $-60$  mV) of rapidly, intermediate, and slowly inactivating currents in DRG neurons from WT mice fed with a standard (sd) or LA-enriched diet. **f** Current densities elicited by maximum displacement of DRG neurons, classified by their time constant of inactivation, from WT mice fed with a standard (sd) or LA-enriched diet. Bars are mean  $\pm$  SD. Two-way ANOVA ( $F = 9.1$ ;  $p = 0.0038$ ) and Tukey multiple-comparisons test. **g** Boxplots show the displacement thresholds required to elicit mechanocurrents in DRG neurons from WT mice fed with a standard (sd) or LA-enriched diet. Boxplots show mean (square), median (bisecting line), bounds of box ( $75^{\text{th}}$  to  $25^{\text{th}}$  percentiles), outlier range with 1.5 coefficient (whiskers), and minimum and maximum data points. Two-tailed Mann-Whitney test ( $U = 362.5$ ). **h** Representative current-clamp recordings of membrane potential changes elicited by mechanical stimulation of DRG neurons from WT mice fed with a standard (sd) or LA-enriched diet. **i** Membrane potential peak vs. mechanical indentation of independent DRG neurons from WT mice fed with a standard (sd) or LA-enriched diet. At the top, boxplots show the displacement threshold required to elicit an action potential in these neurons. Boxplots show mean (square), median (bisecting line), bounds of box ( $75^{\text{th}}$  to  $25^{\text{th}}$  percentiles), outlier range with 1.5 coefficient (whiskers), and minimum and maximum data points. Two-tailed unpaired  $t$ -test ( $t = 1.43$ ).  $n$  is denoted in each panel. Post-hoc  $p$ -values are denoted in the corresponding panels. Source data are provided as a Source Data file.



**a**

- WT; standard diet (sd). n = 10
- *Ube3a*<sup>m-/p+</sup>; sd. n = 6
- *Ube3a*<sup>m-/p+</sup>; LA diet. n = 8

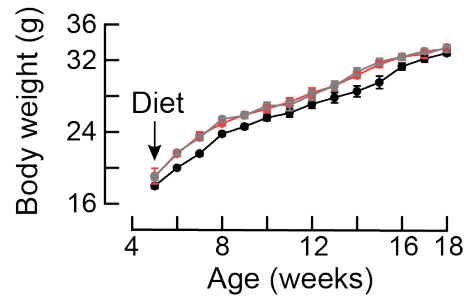**b**

Pinprick

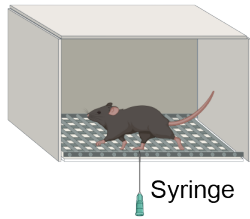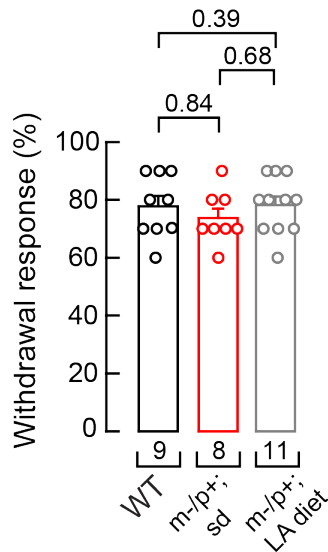**c**

Tail clip

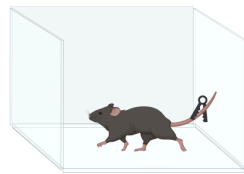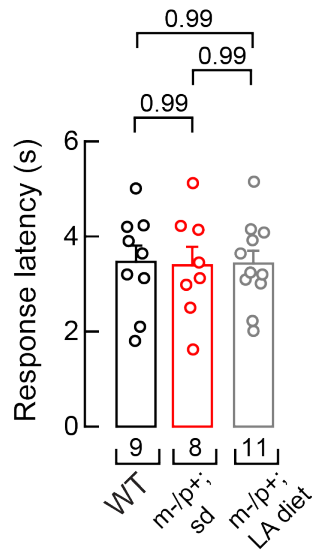**d**

Hot plate

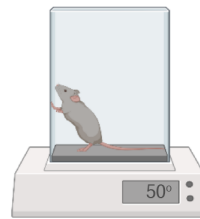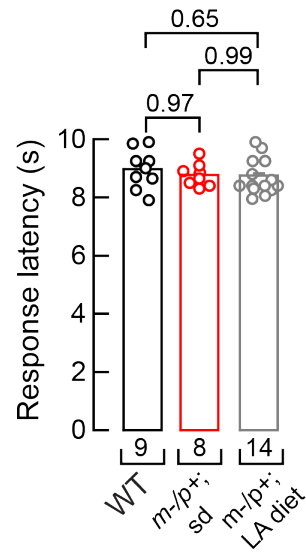**e**

Hargreaves

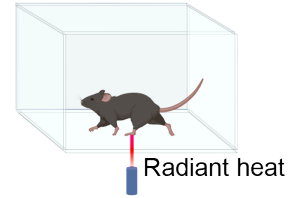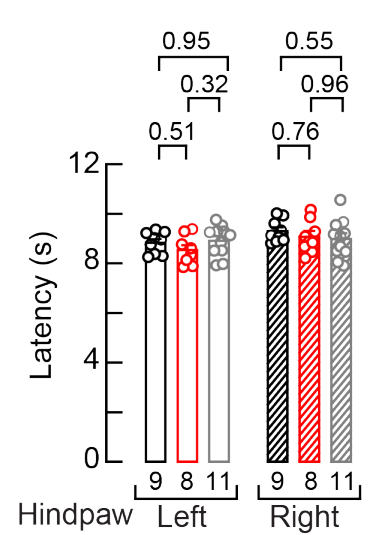**f**

□ WT; sd

□ *m-/p+*; sd□ *m-/p+*; LA diet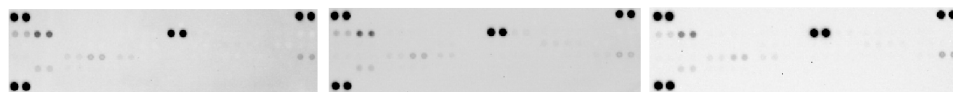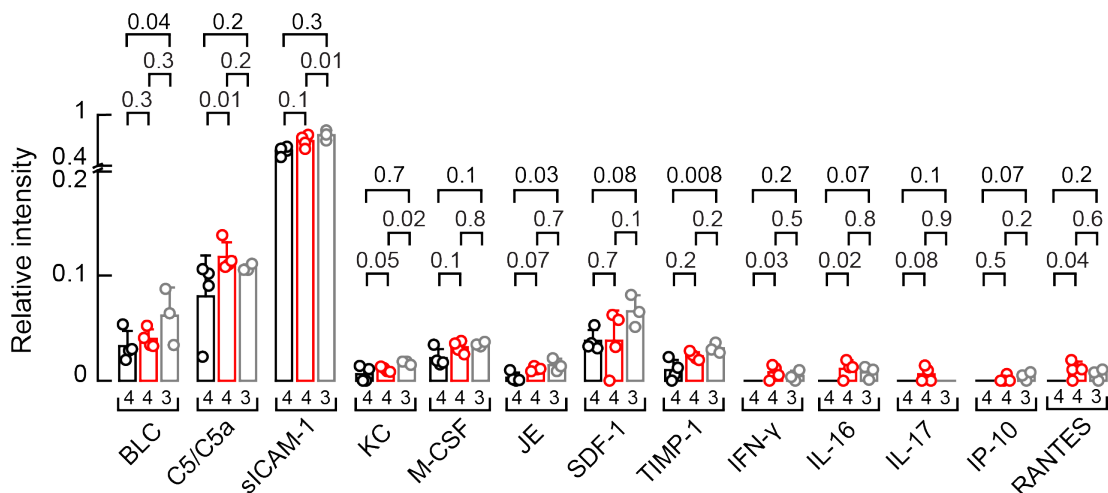

**Supplementary Fig. 7. Body weight, nociceptive responses, and cytokine profiles of mice fed with a standard or LA-enriched diet.**

**a** Body weight of WT and *Ube3a*<sup>m-/p+</sup> mice fed with a standard diet (sd), as well as *Ube3a*<sup>m-/p+</sup> mice fed with a LA-enriched diet. Circles represent the average across the mice for each condition ± SEM. **b** Withdrawal responses to pinprick on the hind paw of WT and *Ube3a*<sup>m-/p+</sup> mice fed with a standard diet (sd), as well as *Ube3a*<sup>m-/p+</sup> mice fed with a LA-enriched diet (10 trials). Bars are mean ± SEM. One-way ANOVA (F = 0.89; *p* = 0.42) and Tukey multiple-comparisons test. **c** Response latency to the pressure exerted by an alligator clip placed in the middle of the tail of WT and *Ube3a*<sup>m-/p+</sup> mice fed with a standard diet (sd), as well as *Ube3a*<sup>m-/p+</sup> mice fed with a LA-enriched diet. Bars are mean ± SEM. One-way ANOVA (F = 0.011; *p* = 0.99) and Tukey multiple-comparisons test. **d** Latency of the first nocifensive response (i.e., licking, shaking, biting, guarding, or jumping) to heat (52 ± 0.5 °C) was scored for WT and *Ube3a*<sup>m-/p+</sup> mice fed with a standard diet (sd), as well as *Ube3a*<sup>m-/p+</sup> mice fed with a LA-enriched diet. Bars are mean ± SEM. One-way ANOVA (F = 0.42; *p* = 0.66) and Tukey multiple-comparisons test. **e** Latency of the first nocifensive response to radiant heat (Hargreaves test) applied to the left and right hind paws of WT and *Ube3a*<sup>m-/p+</sup> mice fed with a standard diet (sd), as well as *Ube3a*<sup>m-/p+</sup> mice fed with a LA-enriched diet. Bars are mean ± SEM. One-way ANOVA (left: F = 1.16 and *p* = 0.33; right: F = 0.57 and *p* = 0.57) and Tukey multiple-comparisons test. **f** Representative blood plasma cytokine profiles and their quantification from WT and *Ube3a*<sup>m-/p+</sup> mice fed with a standard diet (sd), as well as *Ube3a*<sup>m-/p+</sup> mice fed with a LA-enriched diet. The array panel includes multiple cytokines: CXCL13/BLC/BCA-1, IL-5, M-CSF, C5a, IL-6, CCL2/JE/MCP-1, G-CSF, IL-7, CCL12/MCP-5, GM-CSF, IL-10, CXCL9/MIG, CCL1/I-309, IL-12 p70, CCL3/MIP-1 α, CCL11/Eotaxin, IL-1, CCL4/MIP-1 β, ICAM-1, IL-16, CXCL2/MIP-2, IFN-γ, IL-17, CCL5/RANTES, IL-1 α/IL-1F1, IL-23, CXCL12/SDF-1, IL-1 β/IL-1F2, IL-27, CCL17/TARC, IL-1ra/IL-1F3, CXCL10/IP-10, TIMP-1, IL-2, CXCL11/I-TAC, TNF-α, IL-3, CXCL1/KC, TREM-1, IL-4. Only those that elicited positive signals are included on the bar graph. Bars are mean ± SD. Kruskal-Wallis (BLC: H = 4.05 and *p* = 0.13; C5/C5a: H = 6.58 and *p* = 0.04; sICAM-1: H = 6.39 and *p* = 0.04; KC: H = 6.24 and *p* = 0.04; M-CSF: H = 4.01 and *p* = 0.13; JE: H = 5.42 and *p* = 0.07; SDF-1: H = 3.48 and *p* = 0.18; TIMP-1: H = 6.96 and *p* = 0.03; IFN-γ: H = 4.73 and *p* = 0.09; IL-16: H = 5.85 and *p* = 0.054; IL-17: H = 3.85 and *p* = 0.15; IP-10: H = 3.4 and *p* = 0.18; RANTES: H = 4.6 and *p* = 0.1) and Dunn's multiple comparisons test. Cartoons were created with BioRender.com. n is denoted in each panel. Post hoc *p*-values are denoted above the bars. Source data are provided as a Source Data file.

a

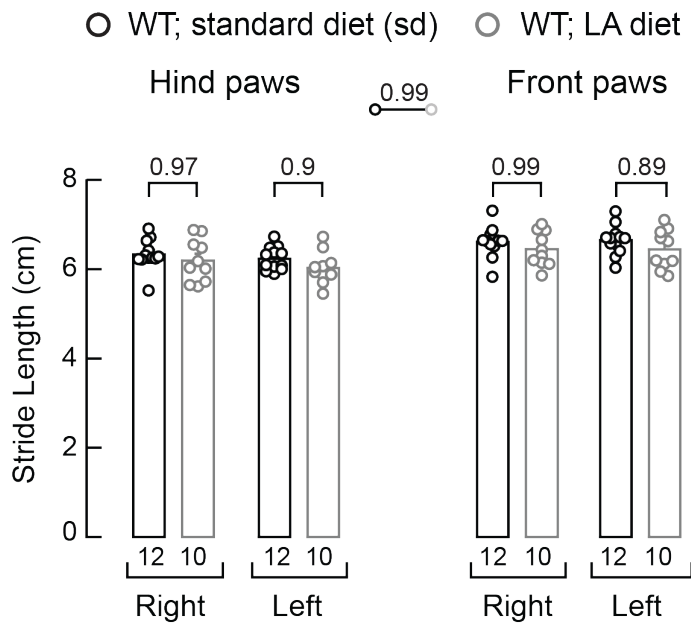

b

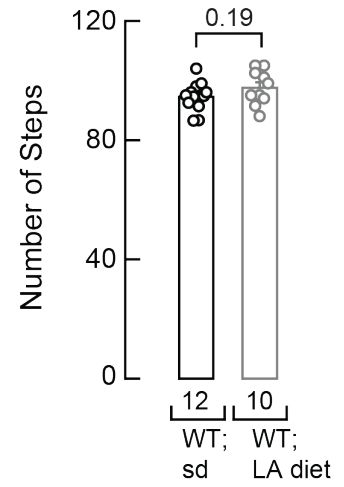

c

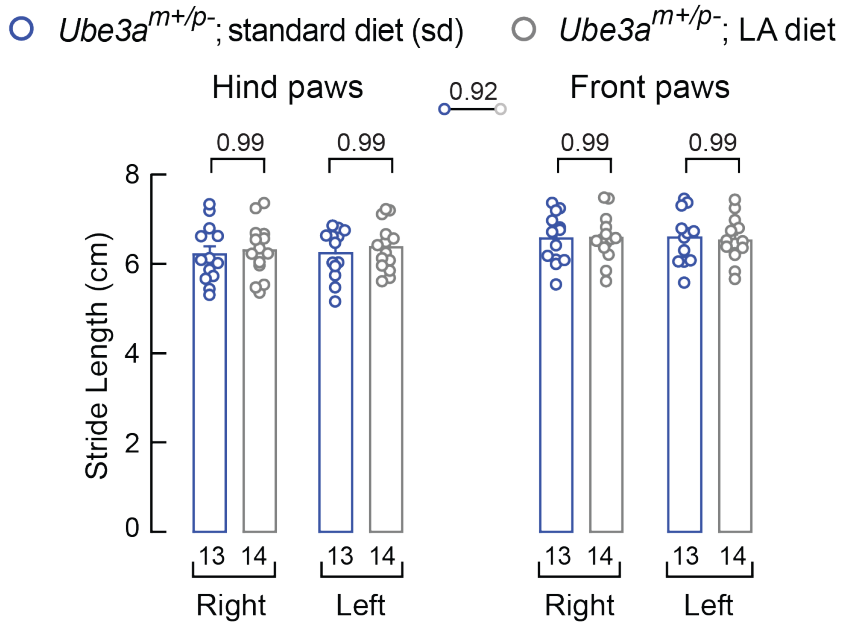

d

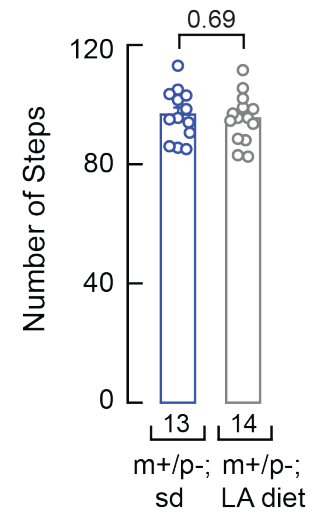

e

Accelerating rotarod

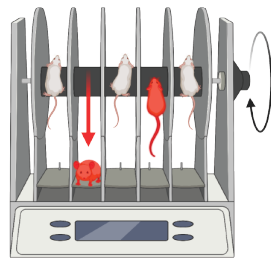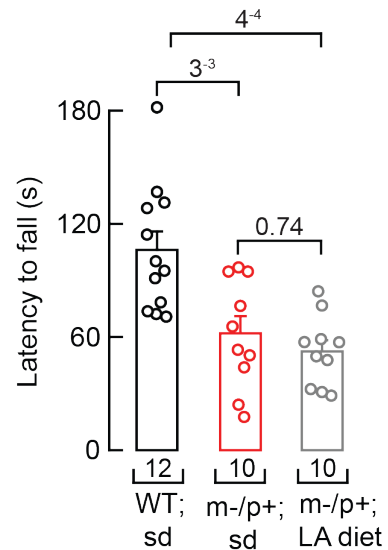

### Supplementary Fig. 8. Gait analyses of the *Ube3a*<sup>m+/p-</sup> mouse.

**a** Stride length analysis of hind and front paws (right and left) from WT mice fed with a standard (sd) or LA-enriched diet. Bars are mean  $\pm$  SEM. Two-way ANOVA ( $F = 0.049$ ;  $p = 0.99$ ) and Tukey multiple-comparisons tests. **b** Step number analysis from WT mice fed with a standard (sd) or LA-enriched diet. Bars are mean  $\pm$  SEM. Two-tailed unpaired *t*-test ( $t = 1.34$ ). **c** Stride length analyses of hind and front paws (right and left) from *Ube3a*<sup>m+/p-</sup> mice fed with a standard (sd) or LA-enriched diet. Bars are mean  $\pm$  SEM. Two-way ANOVA ( $F = 0.17$ ;  $p = 0.92$ ) and Tukey multiple-comparisons tests. **d** Step number analysis from *Ube3a*<sup>m+/p-</sup> mice fed with a standard (sd) or LA-enriched diet. Bars are mean  $\pm$  SEM. Two-tailed unpaired *t*-test ( $t = 0.4$ ). **e** Accelerating rotarod performance of WT and *Ube3a*<sup>m+/p+</sup> mice fed with a standard (sd) or LA-enriched diet. Bars are mean  $\pm$  SEM. One-way ANOVA ( $F = 11.58$ ;  $p = 2.01^{-4}$ ) and Tukey multiple-comparisons tests. The left cartoon was created with BioRender.com. *n* is denoted in each panel. Post-hoc *p*-values are denoted in the corresponding panels. Source data are provided as a Source Data file.

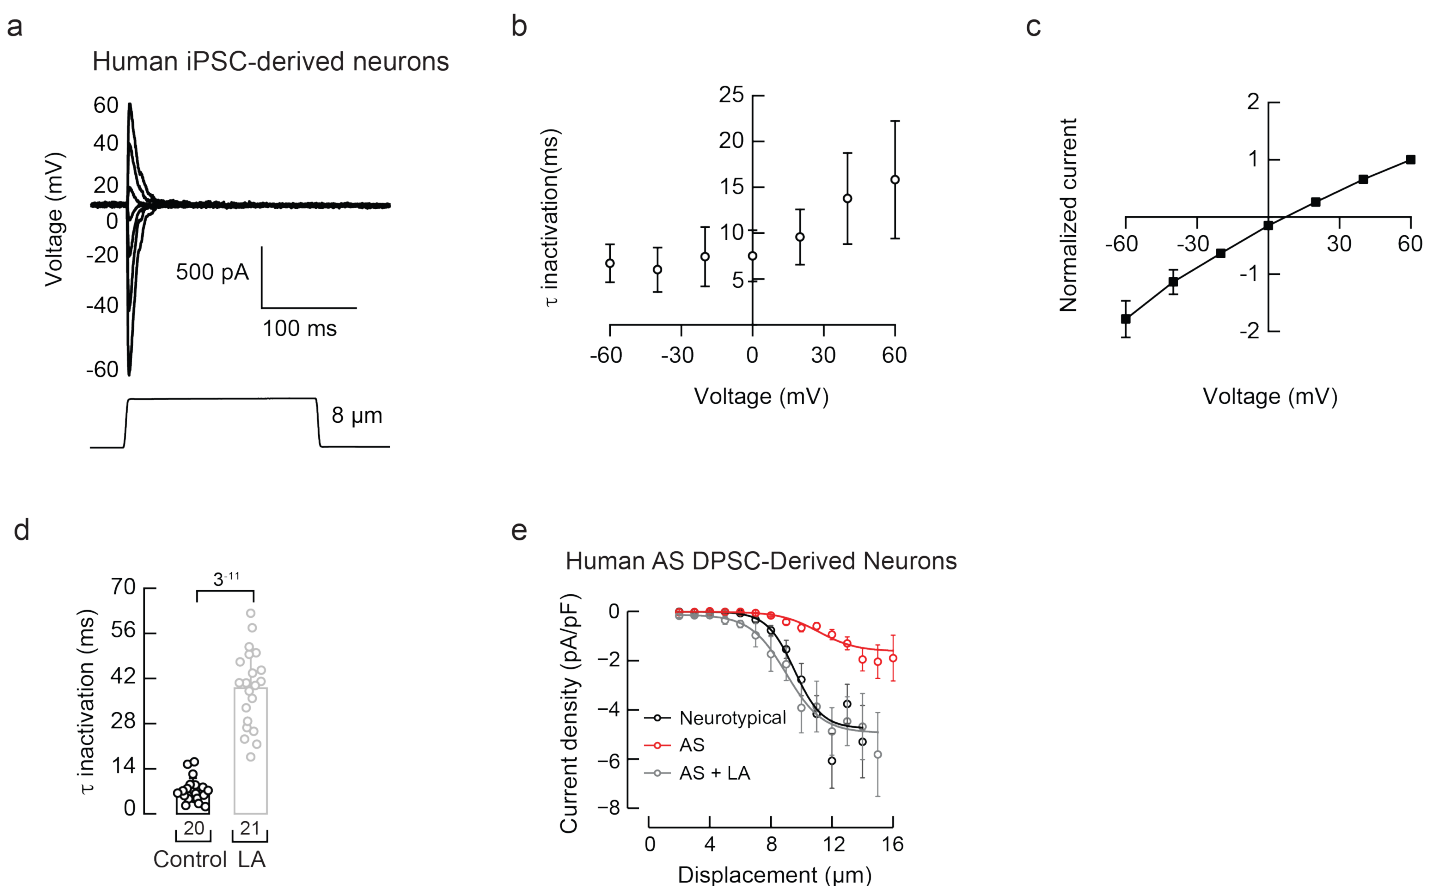

### Supplementary Fig. 9. PIEZO2 mediates mechanically evoked currents in human iPSC-derived sensory neurons, and LA increases mechanocurrents in DPSC-derived neurons from AS individuals.

**a** Representative whole-cell patch-clamp recordings (with voltage pulses ranging from -60 to +60 mV) of human iPSC-derived sensory neurons elicited by mechanical stimulation (bottom). **b** Time constants of inactivation elicited by maximum displacement with voltage pulses ranging from -60 to +60 mV. Circles are mean  $\pm$  SD. *n* = 3. **c** Normalized current-voltage relationship of human iPSC-derived sensory neuron mechano-dependent currents, as determined by whole-cell patch-clamp experiments. Reversal potential (+ 7.75 mV). Squares are mean  $\pm$  SD. *n* = 3. **d** Time constants of inactivation elicited by maximum displacement of control and LA-treated iPSC-derived sensory neurons. Bars are mean  $\pm$  SD. Two-tailed unpaired *t*-test with Welch's correction

( $t = 11.48$ ).  $n$  is denoted in the panel.  $p$ -value is denoted above the bars **e** Current density responses to the displacement of human neurotypical and AS DPSC-derived neurons, with or without LA supplementation. A Boltzmann function was fitted to the data. Each circle represents the mean  $\pm$  SEM. For neurotypical,  $n = 21, 21, 21, 21, 21, 21, 21, 21, 19, 14, 8, 6, 3$ , per displacement. For AS,  $n = 31, 31, 31, 31, 31, 31, 31, 31, 29, 24, 21, 17, 12, 8, 5$ , per displacement. For AS + LA,  $n = 21, 21, 21, 21, 21, 21, 19, 19, 16, 13, 7, 5, 4$ , per displacement. Source data are provided as a Source Data file.
